# Supplementary material for: Non-Invasive Imaging and Scoring of Peritoneal Metastases in Small Preclinical Animal Models Using Ultrasound: A Preliminary Trial
Source: MDPI journal article supplement (doi:10.3390/biomedicines10071610), 2022-07-06

**Supplementary Figure S1.** Ultrasound settings

| Ultrasound parameters           | Setting      |
|---------------------------------|--------------|
| System                          | NZE1700 CX50 |
| Transducer                      | L15-7io      |
| Depth                           | 2.5 cm       |
| Frequency                       | 42 Hz        |
| Mode                            | 2D, Res      |
| Focal zone                      | 1-2          |
| Gain (Gn)                       | 90           |
| Compress (C)                    | 66           |
| Decibels                        | -0.3 dB      |
| Mechanical Index (MI)           | 0.5          |
| Thermal Index Soft Tissue (TIS) | 0.1          |

**Supplementary Figure S2 .** The tumor growth over time is presented for three regions in rat 1,2,3,5 and 6

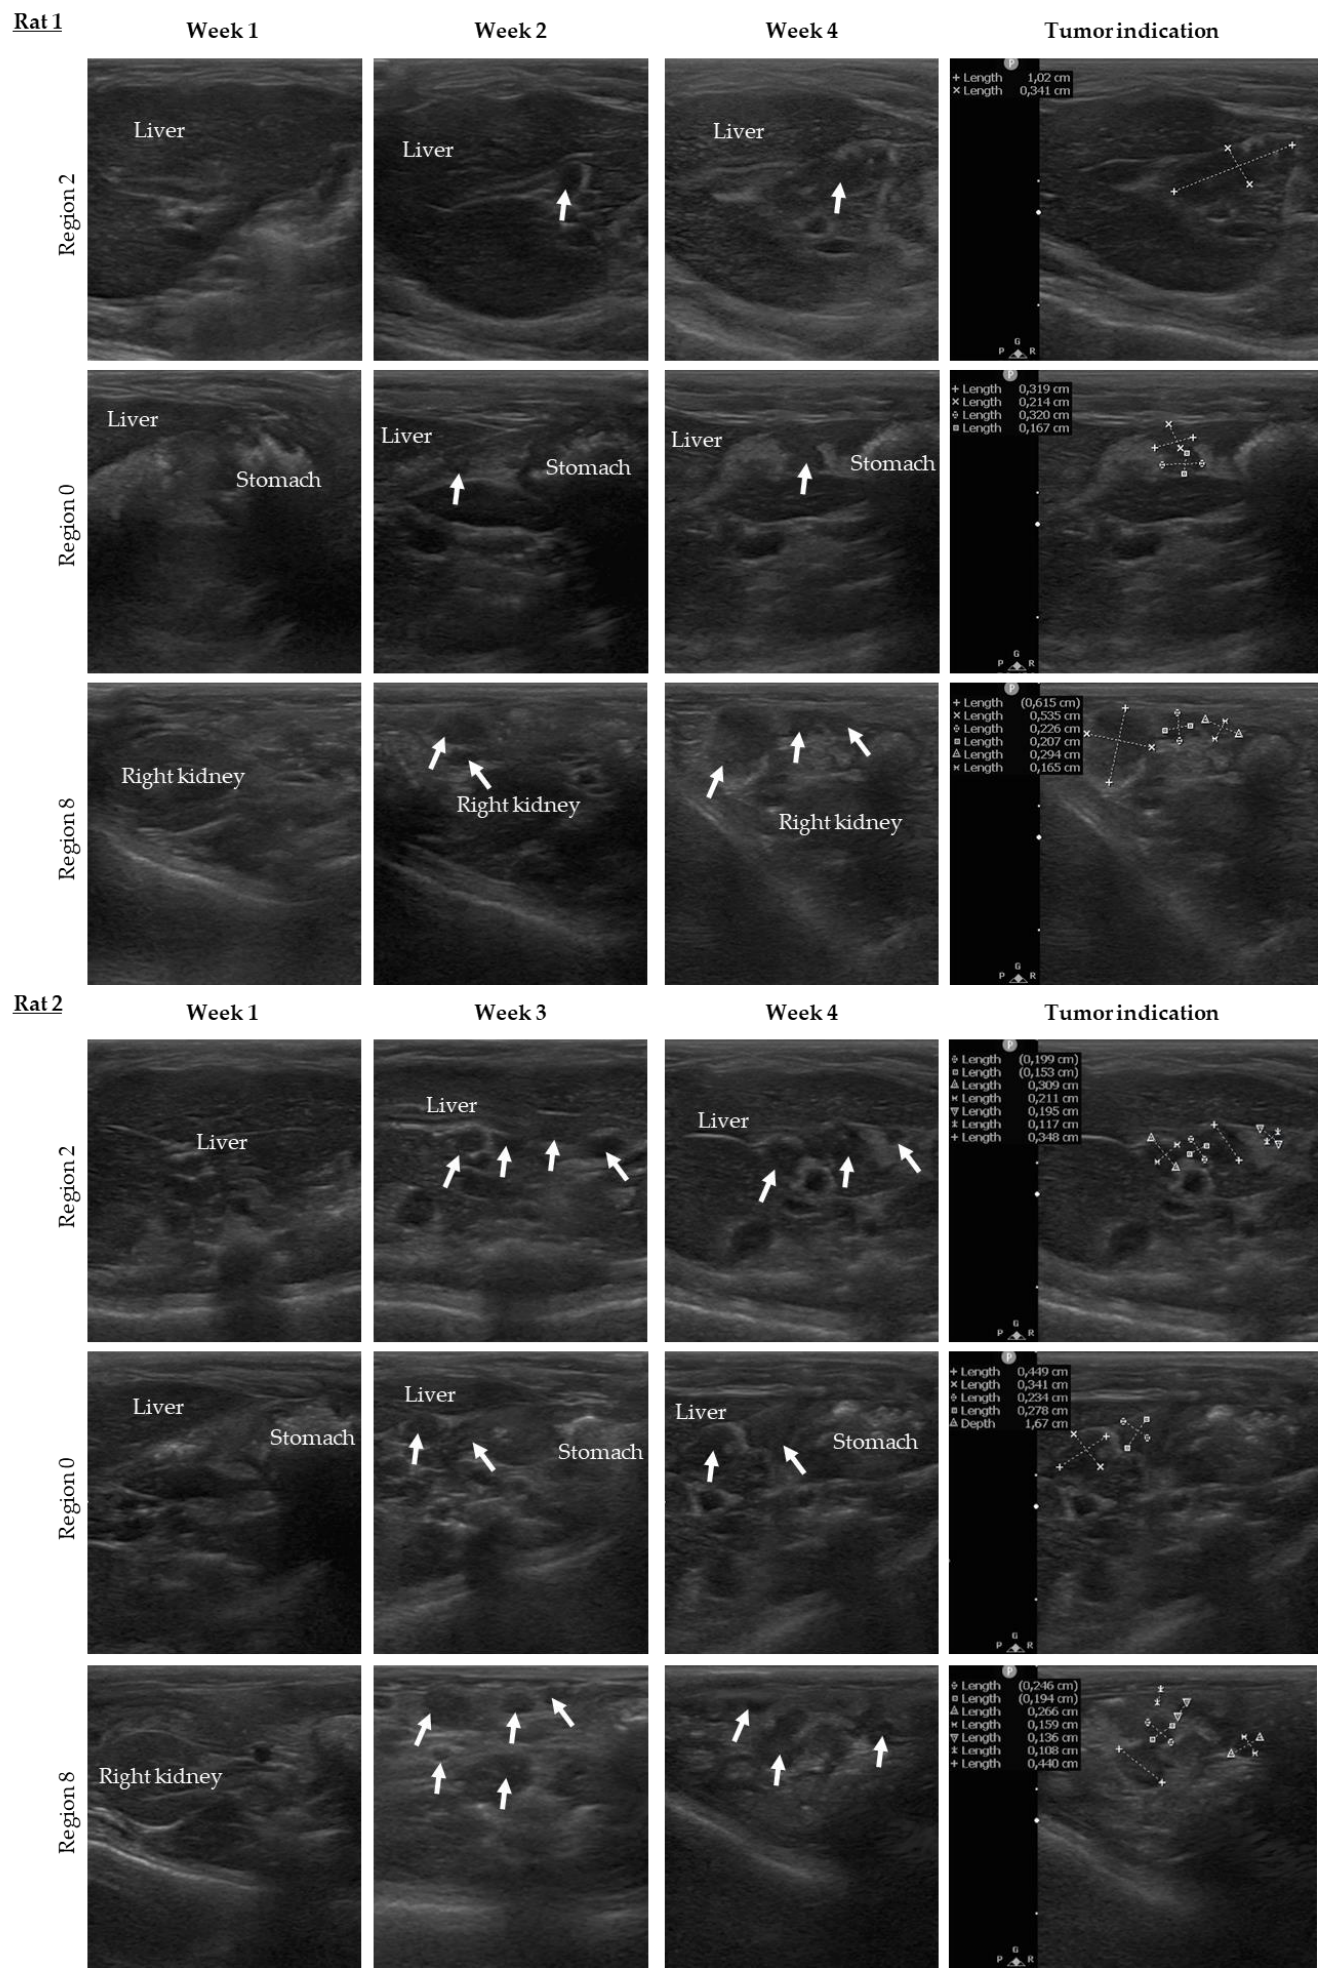

**Rat 3**

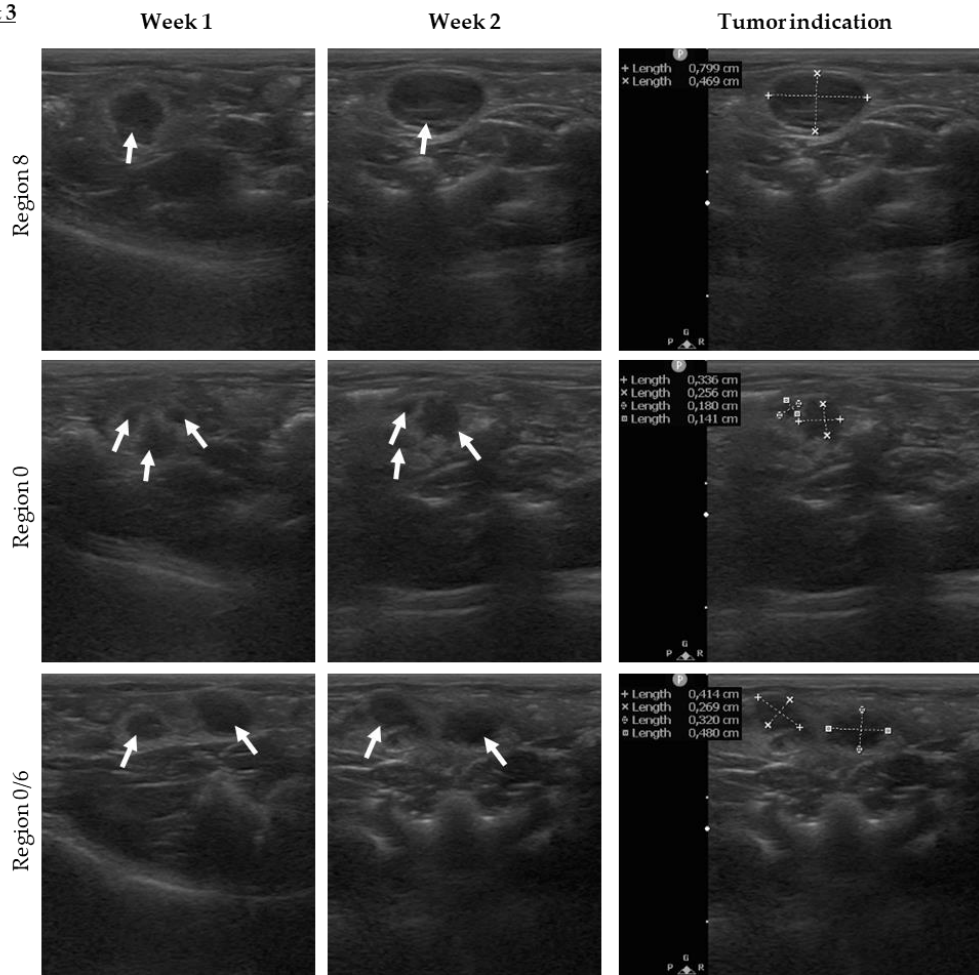

**Rat 5**

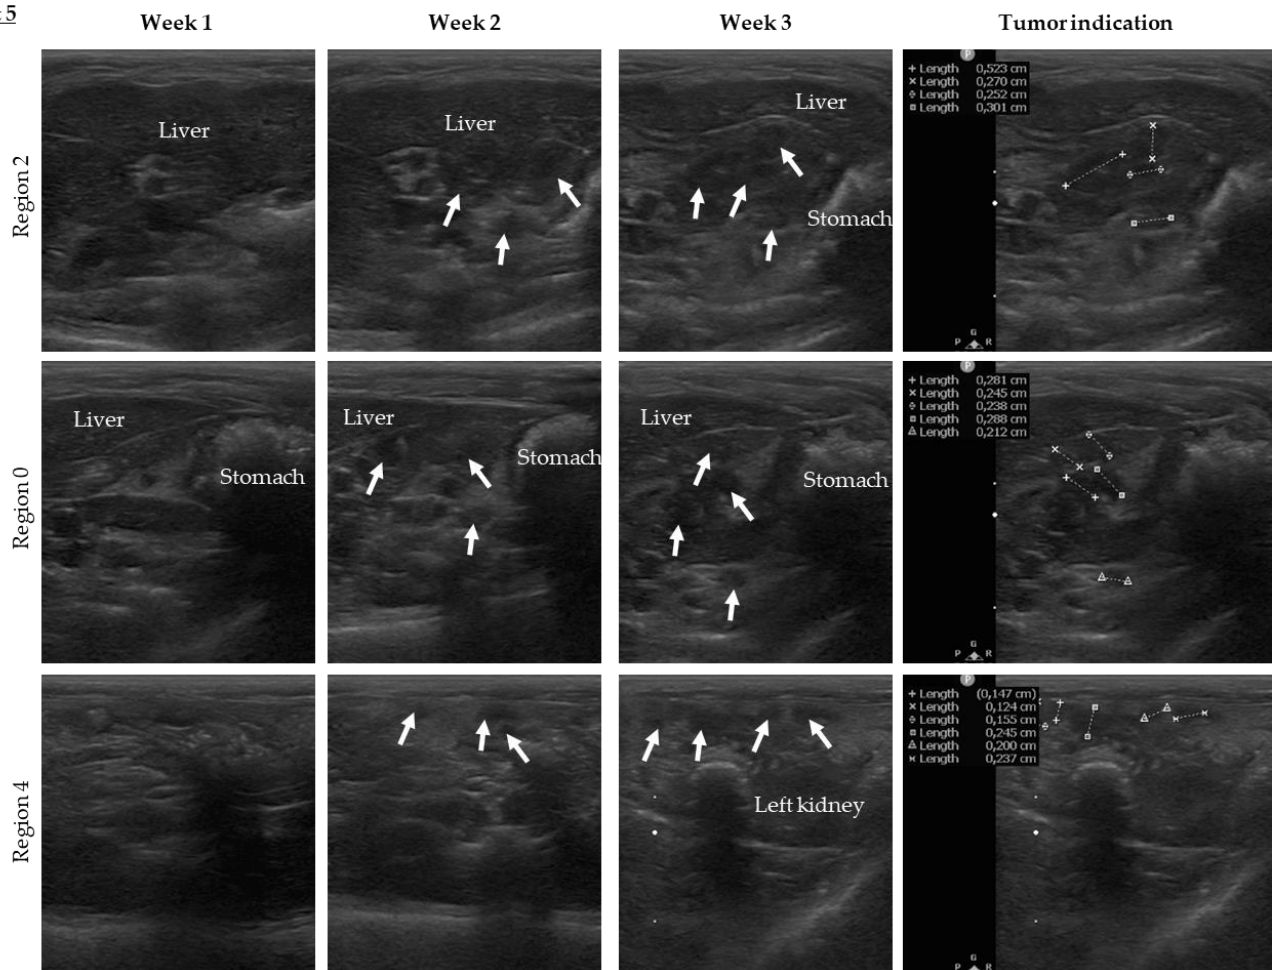

**Supplementary Figure S2.** The tumor growth over time is presented for three regions in rat 1,2,3,5 and 6.

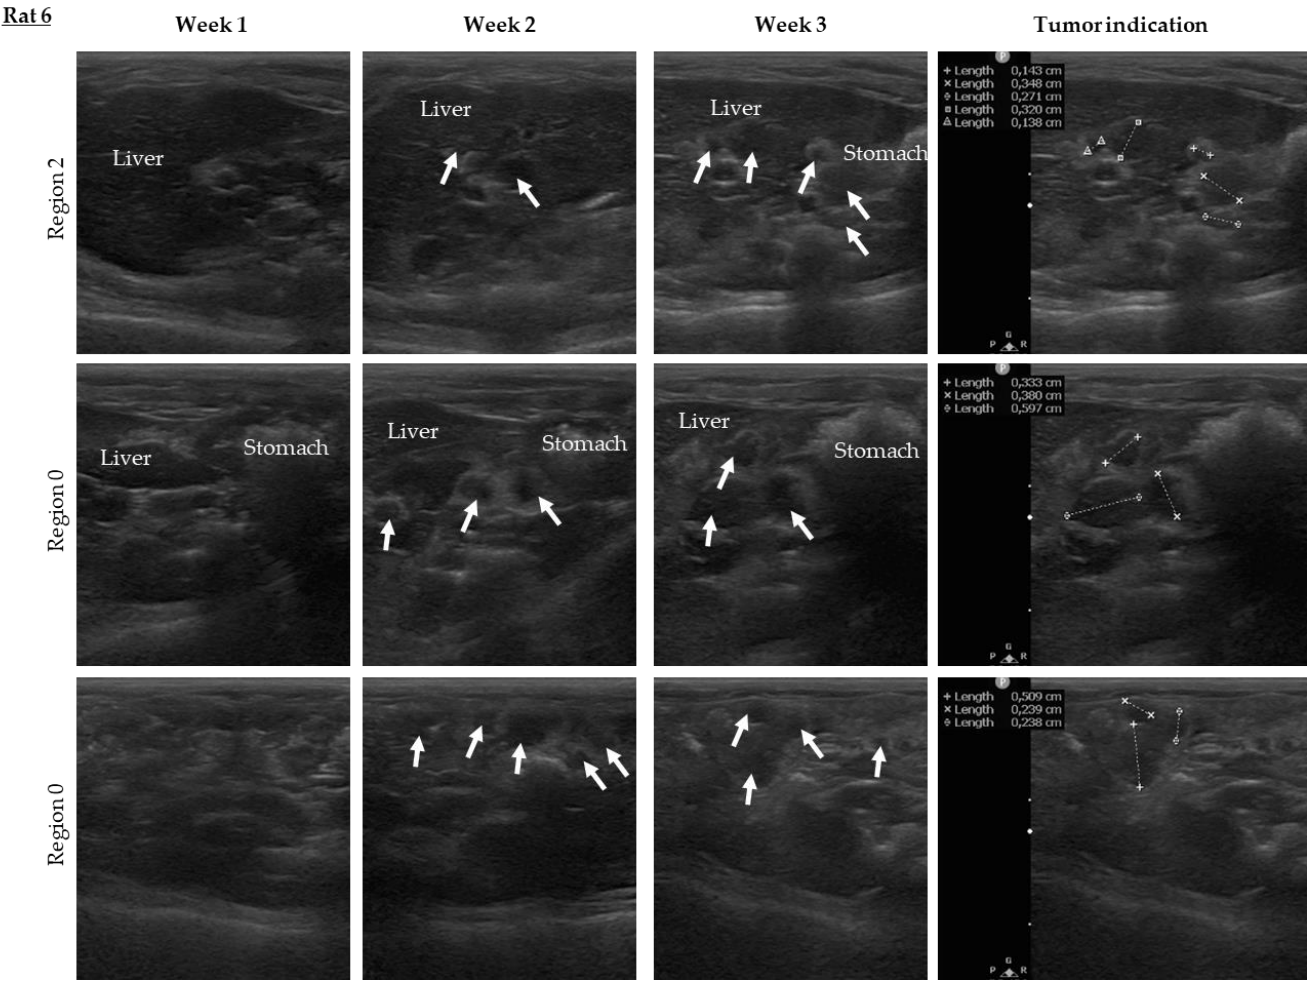





**Supplementary Figure S4.** Tumors on ultrasound compared to the *ex vivo* tumor load for rat 1, 2, 3, 5 and 6  
Rat 1 – PCI score of 12

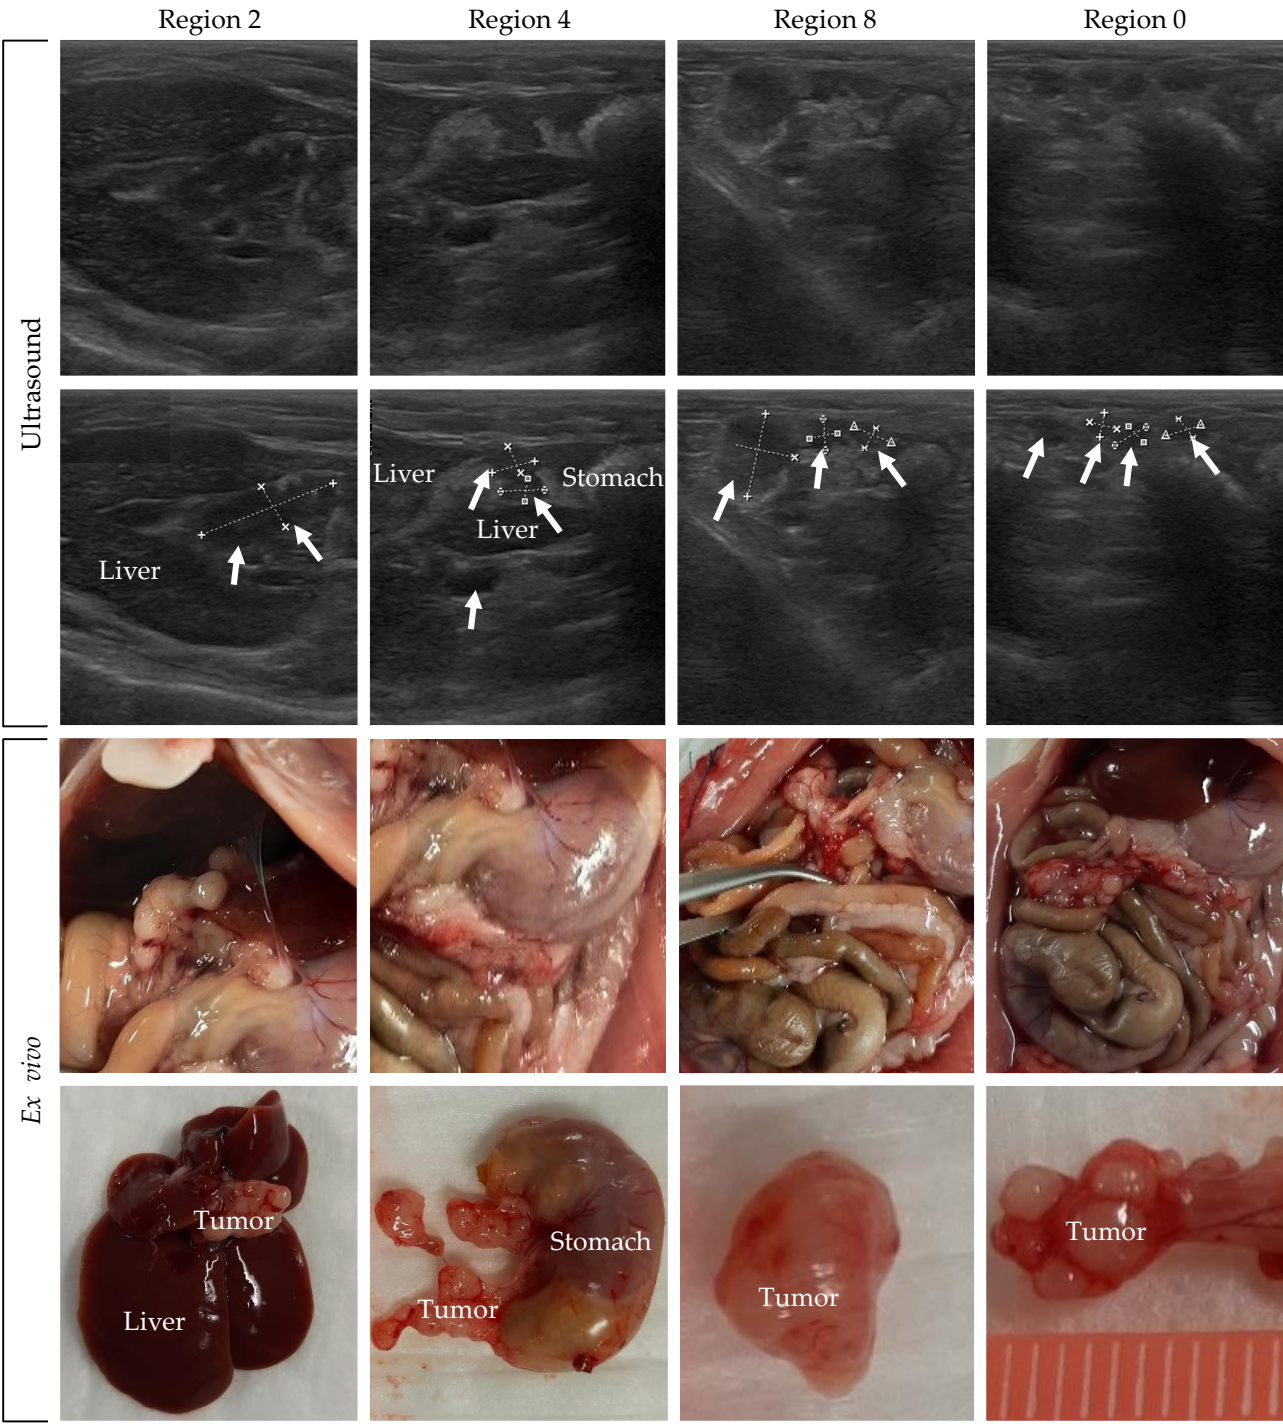

**Supplementary Figure S4.** Tumors on ultrasound compared to the *ex vivo* tumor load for rat 1, 2, 3,

5 and 6

**Rat 2 – PCI score of 17**

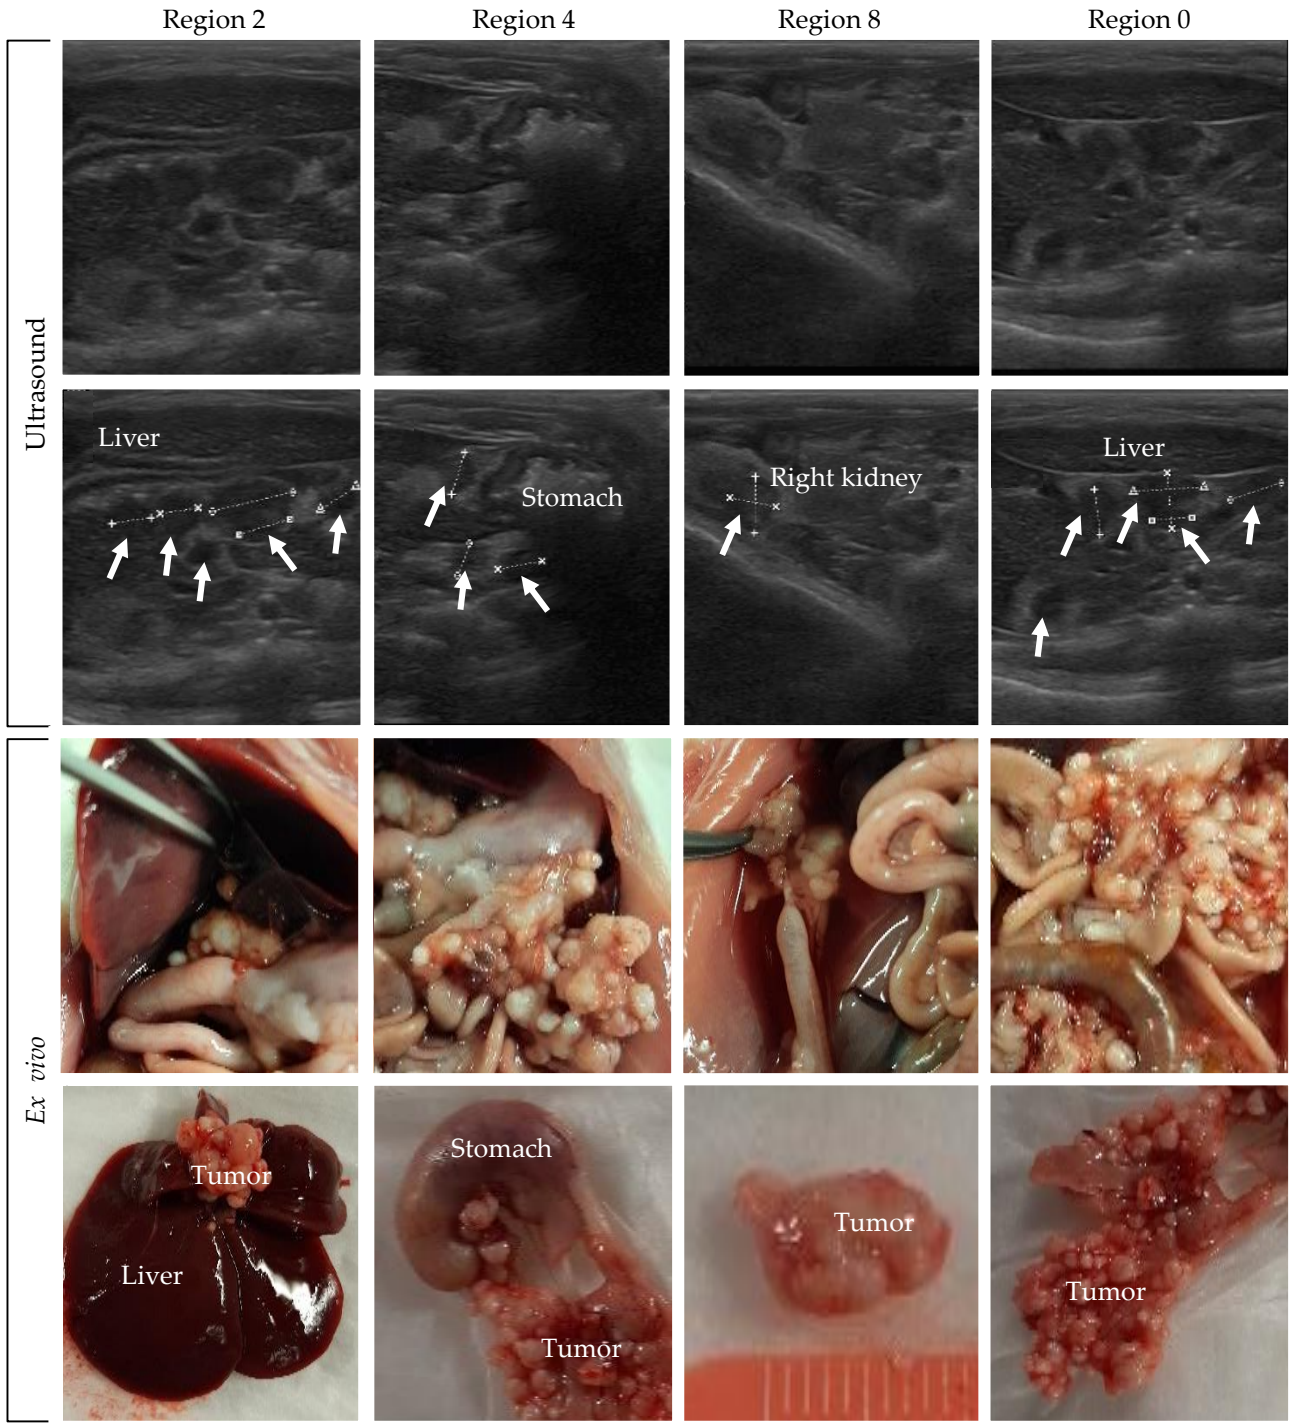



**Supplementary Figure S4.** Tumors on ultrasound compared to the *ex vivo* tumor load for rat 1, 2, 3,

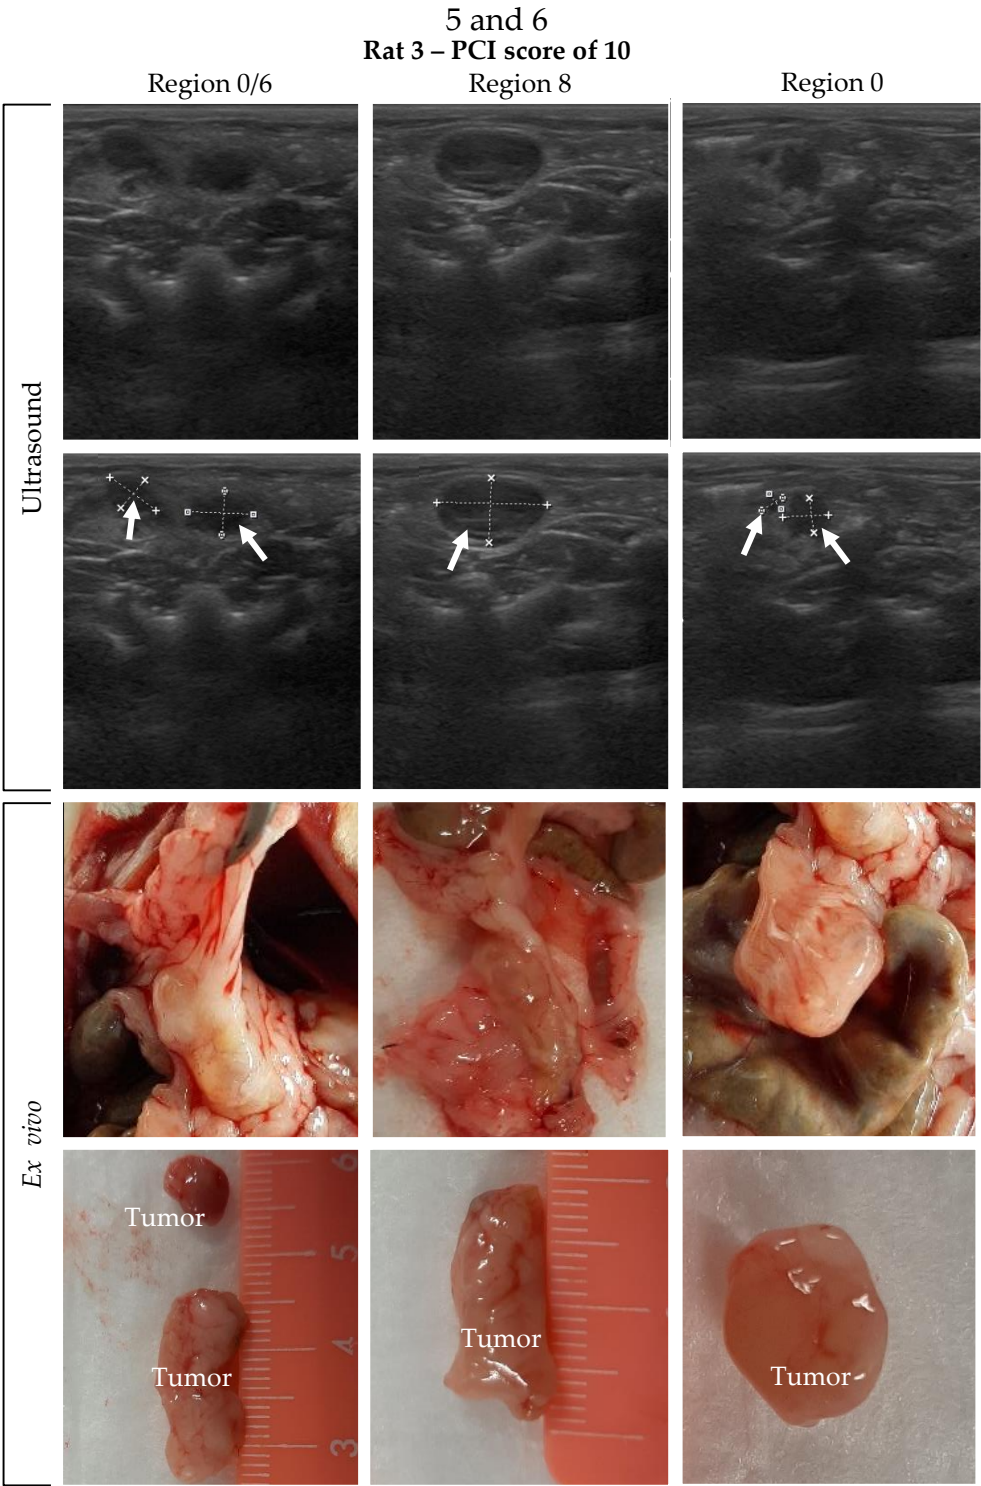



**Supplementary Figure S4.** Tumors on ultrasound compared to the *ex vivo* tumor load for rat 1, 2, 3,

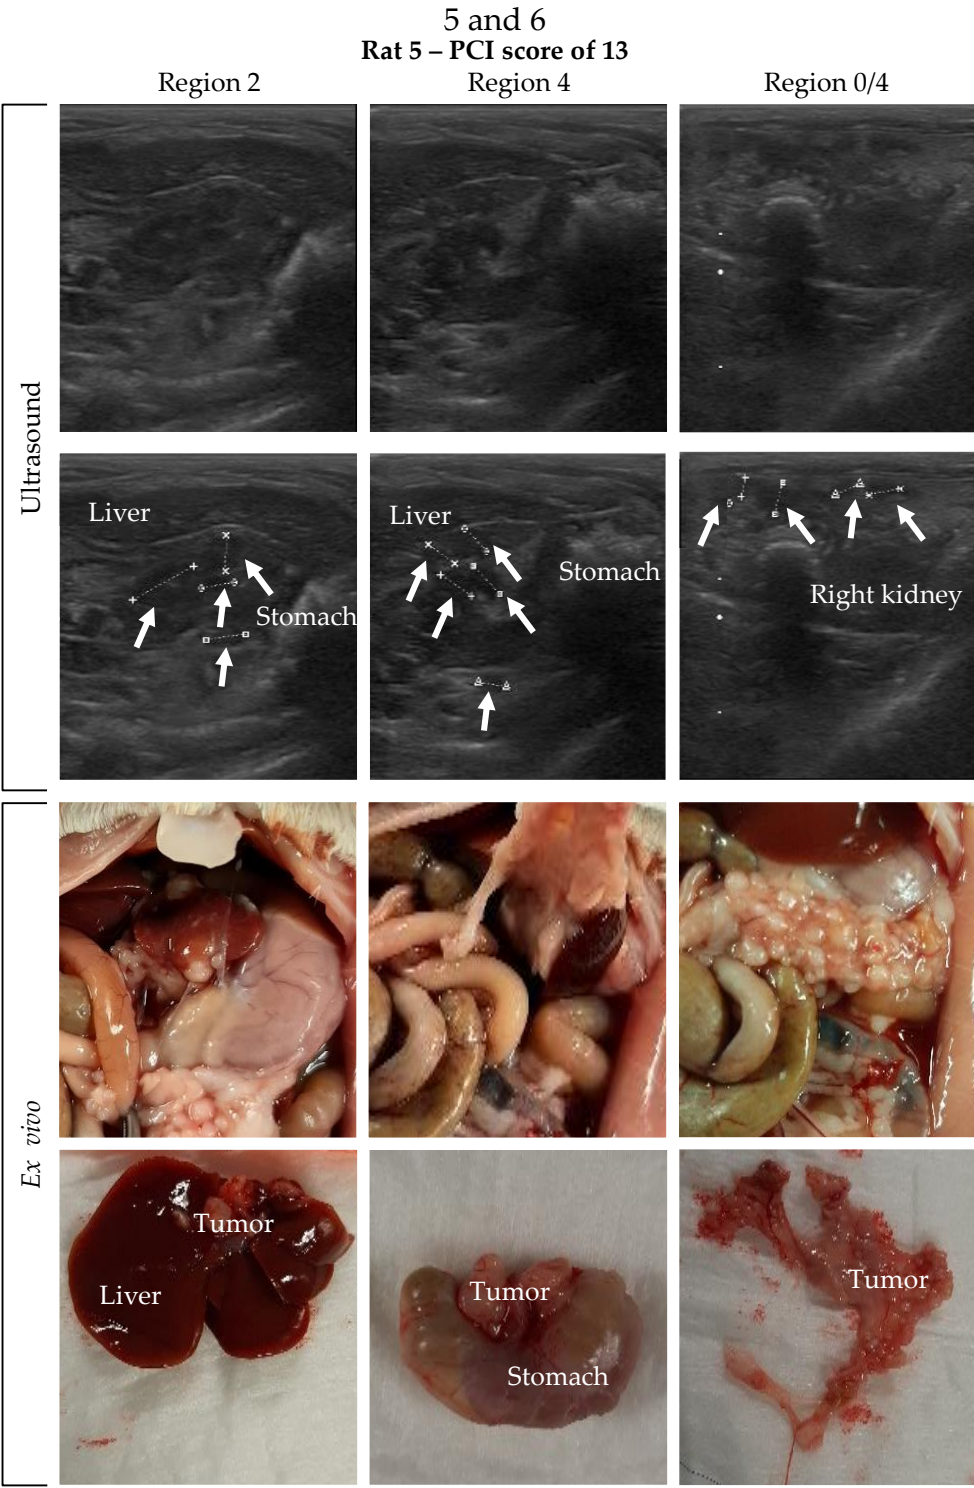

**Supplementary Figure S4.** Tumors on ultrasound compared to the *ex vivo* tumor load for rat 1, 2, 3, 5 and 6  
Rat 6 – PCI score of 10

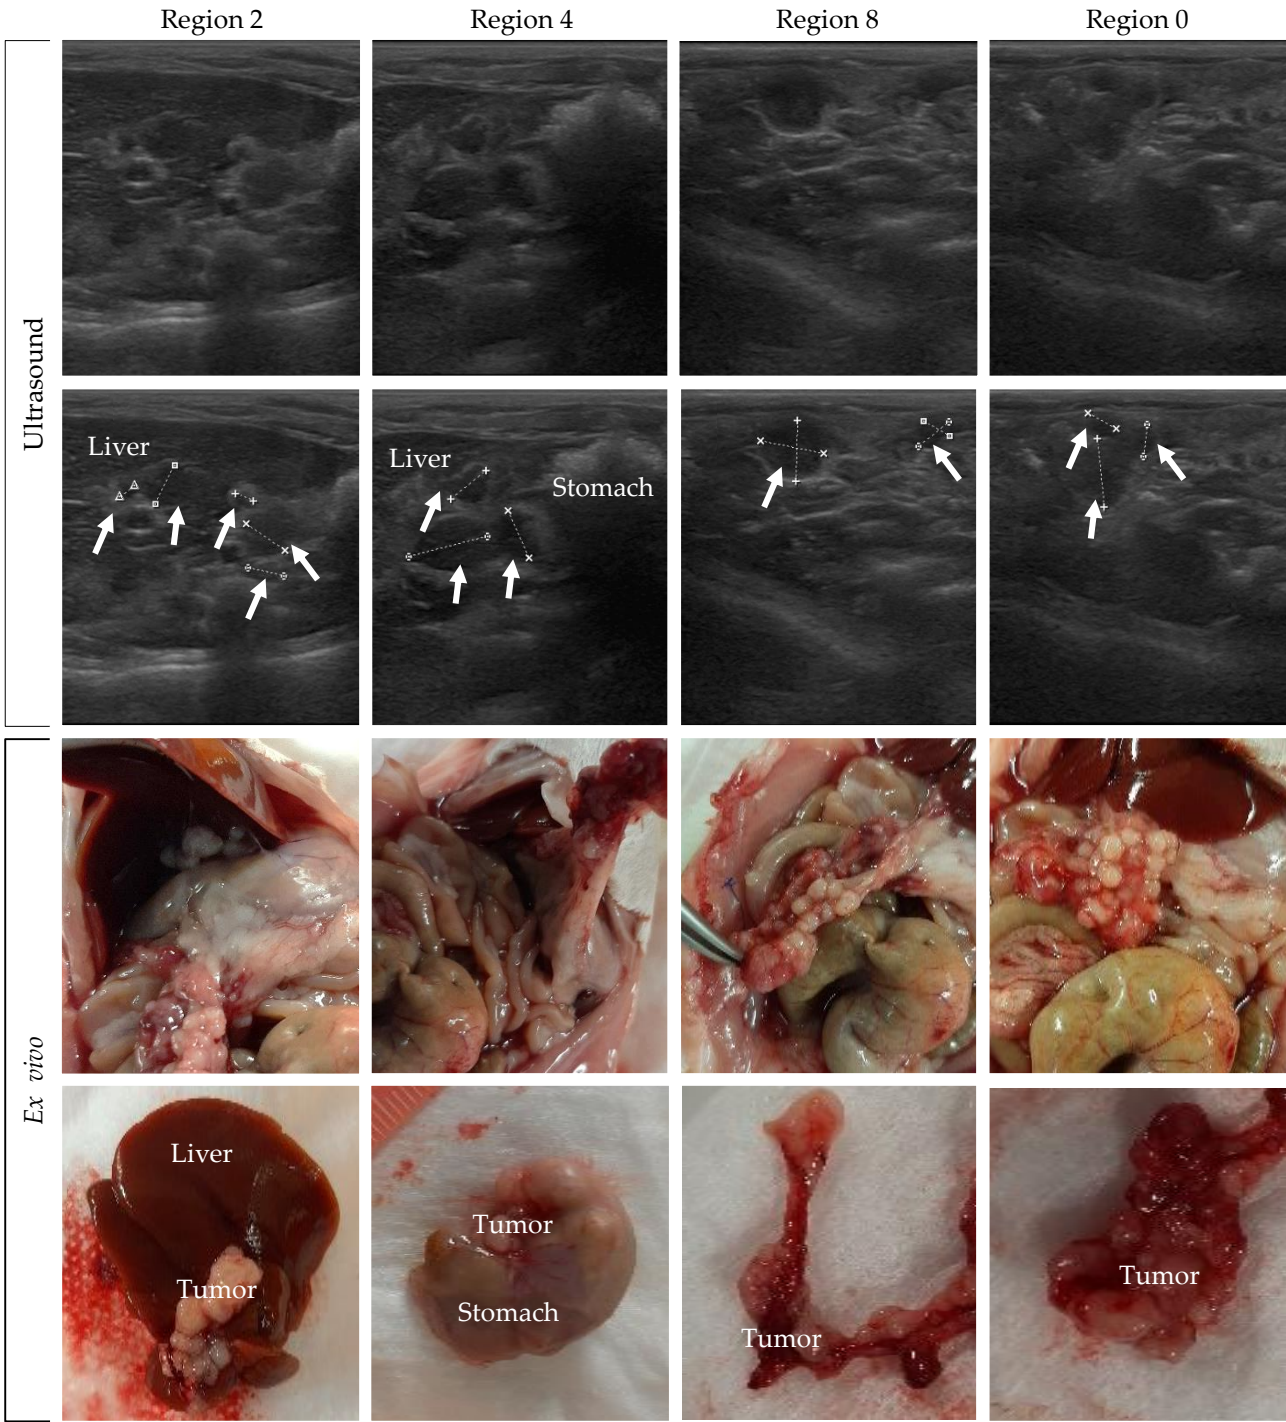

Supplement: s1 [file s1]
